# Supplementary material
Source: PubMed Central journal article supplement (PMC3203666)
Supplement: cr20114x1.pdf [file cr20114x1.pdf]

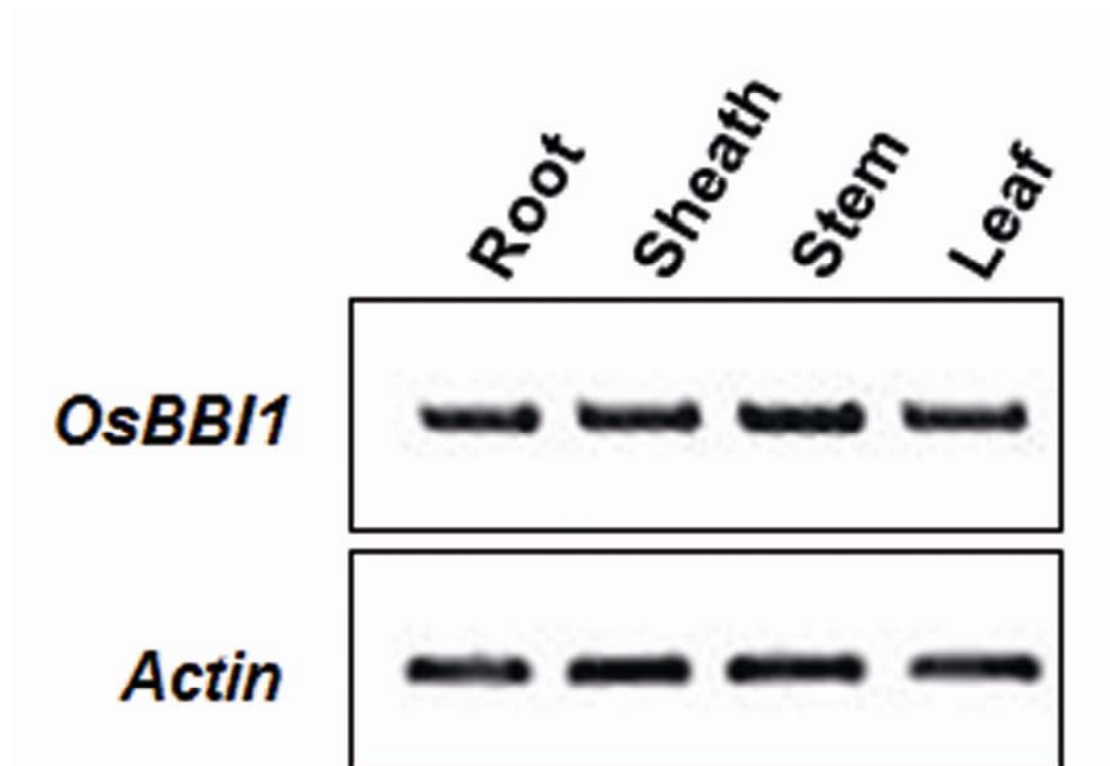

**Supplementary information, Figure S1** Expression patterns of *OsBB11* in different tissues of rice plants.

Samples were collected from eight-week-old plants and expression of *OsBB11* was analysed by RT-PCR using *OsBB11*-specific primers with actin as an internal control.
