# Supplementary material
Source: PubMed Central journal article supplement (PMC3203666)
Supplement: cr20114x3.pdf [file cr20114x3.pdf]

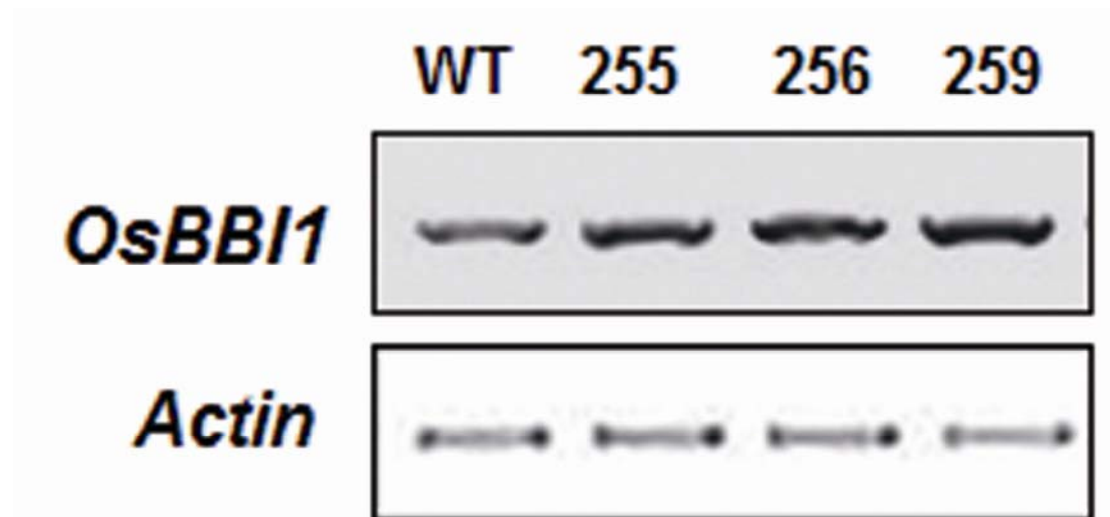

**Supplementary information, Figure S3** Expression levels of *OsBBI1* in transgenic lines.

Leaf samples were collected from eight-week-old plants and expression of *OsBBI1* was analysed by RT-PCR using *OsBBI1*-specific primers with actin as an internal control.
