# Supplementary material
Source: PubMed Central journal article supplement (PMC3203666)
Supplement: cr20114x4.pdf [file cr20114x4.pdf]

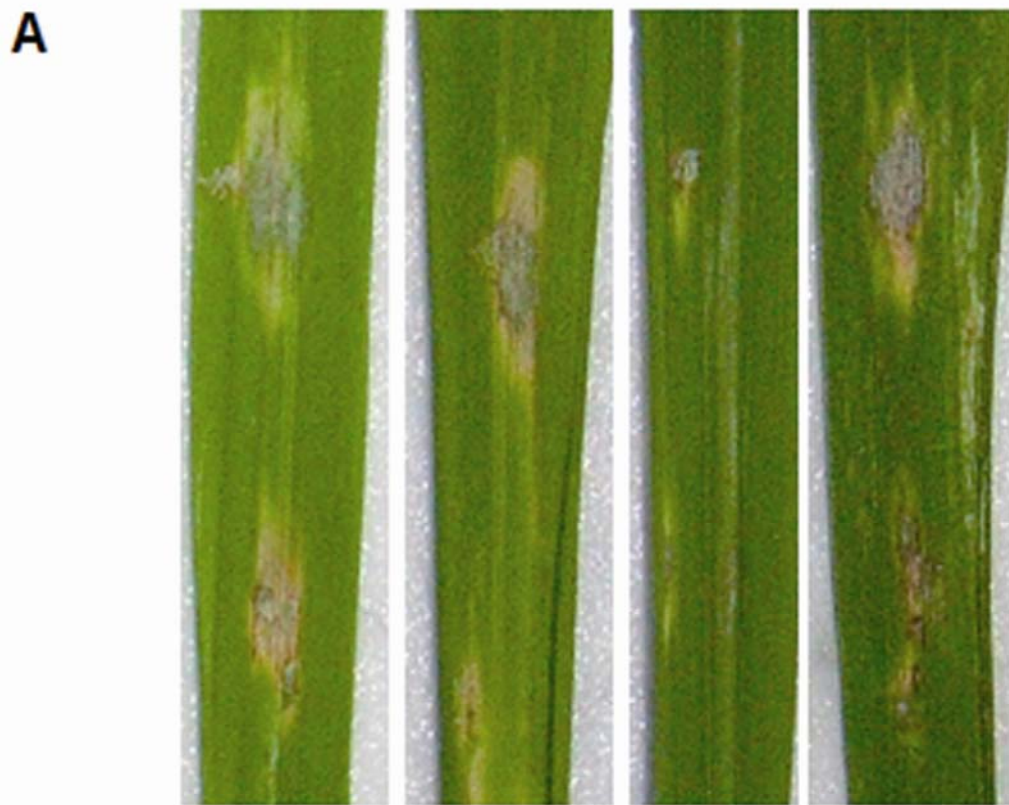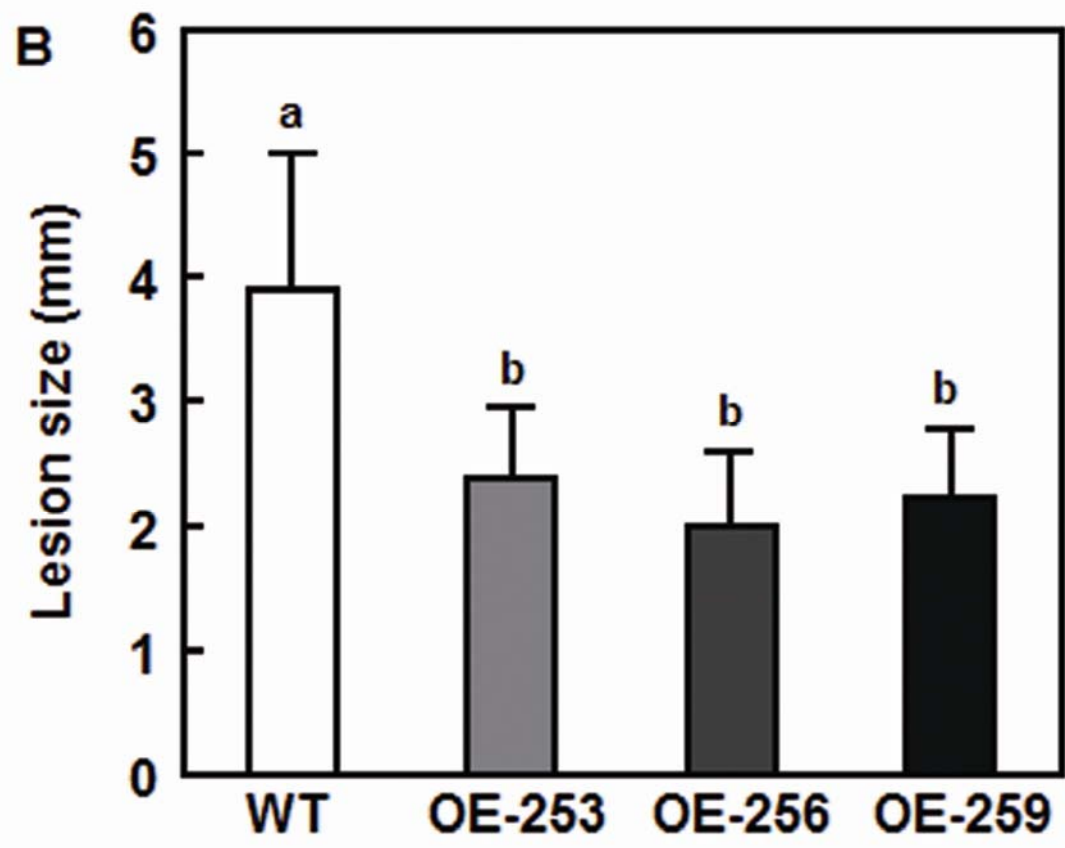

**Supplementary information, Figure S4** Increased resistance of the OsBBI1-OE plants to *M. oryzae* in detached leaf assay.

Leaves were detached from four-week-old plants and inoculated by placing drops of spore suspension of *M. oryzae*. Photos were taken (**A**) and lesion sizes (**B**) were measured at 5 DPI. At least 50 lesions from 10 representative diseased leaves of 10 plants were measured. Data presented are the means  $\pm$  standard errors from three independent experiments. Different letters above columns indicate significant difference at  $P = 0.05$ .
