# Supplementary material
Source: PubMed Central journal article supplement (PMC3203666)
Supplement: cr20114x5.pdf [file cr20114x5.pdf]

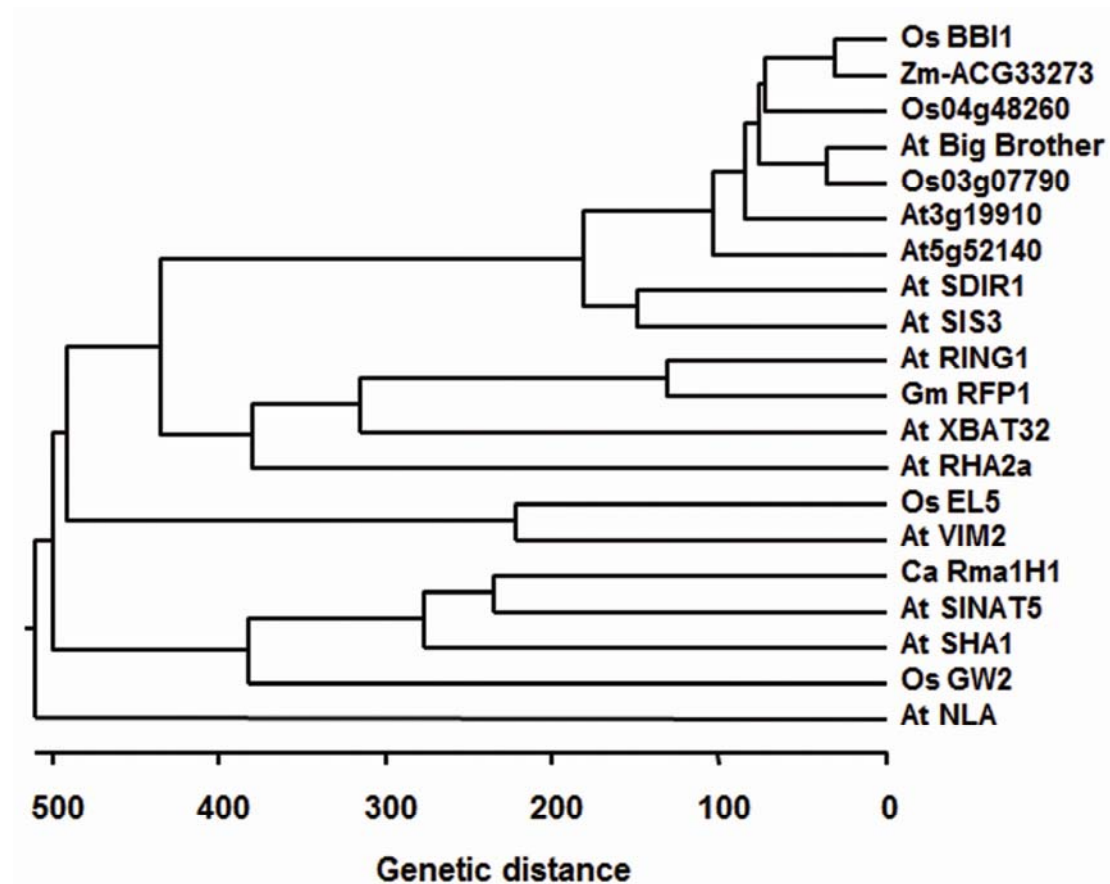

**Supplementary information, Figure S5** Phylogenetic tree of OsBBI1 and other homologous plant RING proteins.

Sequence alignment was performed using the Clustal W program in DNASTar software (Lasergen). The sequences used for construction of the phylogenetic tree are as follows: *Arabidopsis thaliana* (At) At3g19910 (AAK73948), At5g52140 (ABE66242), Big Brother (At3g63530, AAQ22666), SDIR1 (At3g55530, AAP13413), SIS3 (At3g47990, NP\_190382), RING1 (At5g10380, NP\_196600), RHA2a (At1g15100, AAL91611), VIM2 (At1g66050, NP\_176779), SINAT5 (At5g53360, AAM11573), XBAT32 (At5g57740, AAS49051), SHA1 (At5g63780, NP\_201183) and NLA (At1g02860, NP\_001117218); rice (*Oryza sativa*, Os) Os04g48260, Os03g07790, BBI1 (Os06g03580), EL5 (Os02g15120, BAD19799) and GW2 (Os02g14720, ABO31101), soybean (*Glycine max*, Gm) RFP1 (ACI42847), and pepper (*Capsicum annuum*, Ca) Rma1H1 (AAR99376).
